# Supplementary material for: InvivoPen: A novel plasma source for in vivo cancer treatment
Source: PubMed Central journal article supplement (PMC7052936; doi:10.7150/jca.38613), 2020-02-10
Supplement: jcav11p2273s1.pdf [file jcav11p2273s1.pdf]

**Supplementary Table 1. Erythrocyte components analysis from the blood test.** RBC, MCV, MCH, MCHC, RDW-CV, RDW-SD and HCT each represents red blood cell, mean corpuscular volume, mean corpuscular hemoglobin, mean corpuscular hemoglobin concentration, RDW coefficient of variation, RDW standard deviation and hematocrit, respectively.

|                     | 2 WEEKS |        | 4 WEEKS |        |        |           | 5 WEEKS |        |        |           |
|---------------------|---------|--------|---------|--------|--------|-----------|---------|--------|--------|-----------|
|                     | Healthy | Tumor  | Healthy | Tumor  | PAM    | invivoPen | Healthy | Tumor  | PAM    | invivoPen |
| RBC ( $10^{12}/L$ ) | 8.63    | 9.43   | 8.01    | 8.33   | 8.53   | 9.23      | 7.60    | 7.08   | 9.39   | 8.85      |
| MCV (fL)            | 48.68   | 48.58  | 48.53   | 46.00  | 48.77  | 47.63     | 47.80   | 41.20  | 48.30  | 47.93     |
| MCH (pg)            | 17.45   | 17.50  | 18.03   | 16.37  | 17.47  | 16.70     | 16.73   | 13.70  | 16.17  | 16.10     |
| MCHC (g/L)          | 359.25  | 360.17 | 372.00  | 355.67 | 357.67 | 350.67    | 349.67  | 333.00 | 335.33 | 335.75    |
| RDW-CV (%)          | 17.33   | 13.88  | 13.57   | 15.10  | 13.50  | 13.20     | 13.23   | 18.60  | 13.40  | 13.73     |
| RDW-SD (fL)         | 36.73   | 29.90  | 29.23   | 31.33  | 29.40  | 27.83     | 27.67   | 33.30  | 28.53  | 29.08     |
| HCT (%)             | 41.95   | 45.80  | 38.83   | 38.37  | 41.57  | 43.97     | 36.13   | 29.20  | 45.37  | 42.38     |

**Supplementary Table 2. Liver function analysis from the urine test.** ALT, AST, ALP and  $\gamma$ -GT each represents alanine aminotransferase, aspartate aminotransferase, alkaline phosphatase and  $\gamma$ - glutamyl transferase, respectively.

|            | ALT(U/L) | AST(U/L) | ALP(U/L) | $\gamma$ -GT(U/L) |
|------------|----------|----------|----------|-------------------|
| Healthy1   | 200.9    | 110.5    | 147.6    | 11.4              |
| Healthy2   | 192.5    | 122      | 152.8    | 7.5               |
| Healthy3   | 193.6    | 103.8    | 140      | 16                |
| Healthy4   | 188.9    | 143.1    | 146.3    | 20.6              |
| Tumor1     | 149.8    | 130.9    | 95.5     | 27.8              |
| Tumor2     | 234.2    | 134.5    | 106.2    | 1.6               |
| PAM1       | 192.5    | 170.5    | 131.3    | 6                 |
| PAM2       | 278.9    | 477.5    | 629.8    | 8.4               |
| PAM3       | 207.2    | 113.7    | 143.9    | 10.1              |
| invivoPen1 | 271.8    | 586.4    | 459.9    | 1.6               |
| invivoPen2 | 313.6    | 319      | 131.7    | 16.5              |
| invivoPen3 | 175.9    | 166.8    | 156.8    | 14.6              |
| invivoPen4 | 243.4    | 158.6    | 126.4    | 10.8              |
